# Supplementary material for: Administration of Bifidobacterium animalis subsp. lactis strain BB-12® in healthy children: characterization, functional composition, and metabolism of the gut microbiome
Source: Front Microbiol. 2023 May 12;14:1165771. doi: 10.3389/fmicb.2023.1165771 (PMC10275293; doi:10.3389/fmicb.2023.1165771)
Supplement: SUPPLEMENTARY TABLE S1 — Top 25 taxa genes within group. [file Table_1.XLSX]

## Sheet: S2_top_25_taxa_LM_day10
Taxon	term	Estimate	Std.Error	t.value	p.value	fdr	estimate_rank
p__Firmicutes g__Streptococcus s__thermophilus	study_day10	0.876934	0.185804	4.71967	1.82e-05	0.00295036	1
p__Proteobacteria g__Enterobacter s__cloacae complex sp. 35734	study_day10	0.575821	0.293565	1.96148	0.0551874	0.99899	2
p__Proteobacteria g__Klebsiella s__sp. M5al	study_day10	0.306477	0.28888	1.06092	0.293631	0.99899	12
p__Actinobacteria g__Bifidobacterium s__adolescentis	study_day10	0.231186	0.20359	1.13555	0.261354	0.99899	19
p__Actinobacteria g__Bifidobacterium	study_day10	0.226747	0.143882	1.57592	0.121108	0.99899	20
p__Proteobacteria g__Klebsiella s__michiganensis	study_day10	0.22524	0.196381	1.14695	0.256651	0.99899	21
p__Bacteroidetes g__Prevotella s__sp. oral taxon 299	study_day10	-0.206143	0.142778	-1.44381	0.154792	0.99899	25
p__Bacteroidetes g__Alistipes s__shahii	study_day10	-0.212859	0.186232	-1.14297	0.258284	0.99899	24
p__Bacteroidetes g__Odoribacter s__splanchnicus	study_day10	-0.216313	0.152855	-1.41515	0.162984	0.99899	23
p__Bacteroidetes g__Bacteroides s__vulgatus	study_day10	-0.224065	0.216348	-1.03567	0.305151	0.99899	22
p__Bacteroidetes g__Bacteroides s__caecimuris	study_day10	-0.241572	0.221693	-1.08967	0.280883	0.99899	18
p__Bacteroidetes g__Bacteroides s__thetaiotaomicron	study_day10	-0.249448	0.178491	-1.39754	0.168186	0.99899	17
p__Bacteroidetes g__Bacteroides s__cellulosilyticus	study_day10	-0.25536	0.17728	-1.44043	0.15574	0.99899	16
p__Bacteroidetes g__Bacteroides s__heparinolyticus	study_day10	-0.256889	0.22849	-1.12429	0.266053	0.99899	15
p__Bacteroidetes g__Prevotella	study_day10	-0.26789	0.137082	-1.95423	0.0560619	0.99899	14
p__Bacteroidetes g__Prevotella s__intermedia	study_day10	-0.277901	0.125115	-2.22116	0.0307195	0.99899	13
p__Bacteroidetes g__Alistipes s__finegoldii	study_day10	-0.306731	0.214018	-1.4332	0.157787	0.99899	11
p__Bacteroidetes g__Bacteroides s__zoogleoformans	study_day10	-0.307221	0.183855	-1.671	0.10073	0.99899	10
p__Bacteroidetes g__Prevotella s__fusca	study_day10	-0.308696	0.166603	-1.85288	0.0695785	0.99899	9
p__Bacteroidetes g__Bacteroides s__helcogenes	study_day10	-0.316044	0.21234	-1.48839	0.142689	0.99899	8
p__Bacteroidetes g__Prevotella s__melaninogenica	study_day10	-0.317761	0.11171	-2.84452	0.00634646	0.342709	7
p__Bacteroidetes g__Barnesiella s__viscericola	study_day10	-0.332576	0.187875	-1.7702	0.0825562	0.99899	6
p__Bacteroidetes g__Prevotella s__enoeca	study_day10	-0.340733	0.192348	-1.77144	0.0823479	0.99899	5
p__Bacteroidetes g__Alistipes	study_day10	-0.352493	0.300061	-1.17474	0.245451	0.99899	4
p__Bacteroidetes g__Prevotella s__jejuni	study_day10	-0.432211	0.139451	-3.09938	0.00312712	0.253297	3

## Sheet: S2_BB12_top_25_taxa_LM_day10
Taxa	term	Estimate	Std.Error	t.value	p.value	fdr	estimate_rank
p__Actinobacteria g__Bifidobacterium s__animalis	study_day10	1.75293	0.186744	9.38679	4.53e-12	7.93e-10	1
p__Firmicutes g__Streptococcus s__thermophilus	study_day10	1.17022	0.169242	6.91449	1.53e-08	1.34e-06	2
p__Firmicutes g__Lactobacillus s__delbrueckii	study_day10	0.470565	0.130907	3.59464	0.000816	0.0476125	6
p__Firmicutes g__Enterococcus s__casseliflavus	study_day10	0.227513	0.307688	0.739427	0.463574	0.999266	17
p__Firmicutes g__Enterococcus s__sp. FDAARGOS_375	study_day10	0.225561	0.180158	1.25202	0.217179	0.999266	19
p__Actinobacteria g__Bifidobacterium s__pseudocatenulatum	study_day10	-0.205993	0.238582	-0.863405	0.392597	0.999266	25
p__Proteobacteria g__Klebsiella	study_day10	-0.206157	0.184125	-1.11966	0.268935	0.999266	24
p__Proteobacteria o__Enterobacterales	study_day10	-0.209417	0.152911	-1.36953	0.177782	0.999266	23
p__Bacteroidetes g__Prevotella s__jejuni	study_day10	-0.222412	0.189746	-1.17216	0.247441	0.999266	22
p__Proteobacteria g__Enterobacter	study_day10	-0.224331	0.141455	-1.58588	0.119929	0.999266	21
p__Proteobacteria g__Escherichia s__fergusonii	study_day10	-0.225117	0.188856	-1.19201	0.239648	0.999266	20
p__Proteobacteria g__Enterobacter s__roggenkampii	study_day10	-0.227006	0.314964	-0.720734	0.474885	0.999266	18
p__Proteobacteria g__Escherichia s__albertii	study_day10	-0.230271	0.181352	-1.26975	0.210849	0.999266	16
p__Proteobacteria g__Escherichia s__coli	study_day10	-0.243037	0.283726	-0.85659	0.396313	0.999266	15
p__Proteobacteria g__Haemophilus s__parainfluenzae	study_day10	-0.286875	0.249155	-1.15139	0.25579	0.999266	14
p__Firmicutes g__Intestinimonas s__butyriciproducens	study_day10	-0.291392	0.111501	-2.61337	0.0122251	0.534846	13
p__Bacteroidetes g__Alistipes s__finegoldii	study_day10	-0.297006	0.272023	-1.09184	0.280847	0.999266	12
p__Bacteroidetes g__Alistipes s__shahii	study_day10	-0.306948	0.219309	-1.39962	0.168639	0.999266	11
p__Proteobacteria g__Enterobacter s__cloacae complex sp. 35734	study_day10	-0.320929	0.308532	-1.04018	0.303938	0.999266	10
p__Bacteroidetes g__Alistipes	study_day10	-0.346809	0.305665	-1.1346	0.262684	0.999266	9
p__Proteobacteria f__Enterobacteriaceae	study_day10	-0.369987	0.235136	-1.5735	0.122766	0.999266	8
p__Proteobacteria g__Citrobacter s__sp. FDAARGOS_156	study_day10	-0.444714	0.329512	-1.34961	0.184043	0.999266	7
p__Proteobacteria g__Lelliottia s__amnigena	study_day10	-0.476557	0.255255	-1.86699	0.0685753	0.999266	5
p__Proteobacteria g__Enterobacter s__sp. FY-07	study_day10	-0.555104	0.24679	-2.24929	0.0295485	0.941198	4
p__Bacteroidetes g__Porphyromonas s__asaccharolytica	study_day10	-0.613805	0.28072	-2.18654	0.0341381	0.941198	3

## Sheet: S2_top_25_gene_LM_day10
geneID	term	Estimate	Std.Error	t.value	p.value	fdr	estimate_rank	Definition
K00341	study_day10	-0.350501	0.201795	-1.73692	0.0883225	0.924014	20	nuoL; NADH-quinone oxidoreductase subunit L [EC:7.1.1.2]
K00342	study_day10	-0.348618	0.210523	-1.65596	0.103753	0.924014	21	nuoM; NADH-quinone oxidoreductase subunit M [EC:7.1.1.2]
K01277	study_day10	-0.555246	0.302956	-1.83276	0.0725664	0.924014	2	DPP3; dipeptidyl-peptidase III [EC:3.4.14.4]
K01284	study_day10	-0.363046	0.250944	-1.44672	0.153977	0.924014	18	dcp; peptidyl-dipeptidase Dcp [EC:3.4.15.5]
K01787	study_day10	-0.467165	0.245005	-1.90675	0.0620845	0.924014	9	RENBP; N-acylglucosamine 2-epimerase [EC:5.1.3.8]
K01843	study_day10	-0.367855	0.226523	-1.62392	0.11044	0.924014	17	kamA; lysine 2,3-aminomutase [EC:5.4.3.2]
K01960	study_day10	-0.482583	0.282101	-1.71067	0.0931017	0.924014	7	pycB; pyruvate carboxylase subunit B [EC:6.4.1.1]
K02481	study_day10	-0.596533	0.425437	-1.40216	0.166808	0.924014	1	K02481; two-component system, NtrC family, response regulator
K03296	study_day10	-0.402667	0.252722	-1.59332	0.117149	0.924014	12	TC.HAE1; hydrophobic/amphiphilic exporter-1 (mainly G- bacteria), HAE1 family
K03549	study_day10	0.372128	0.224197	1.65983	0.102969	0.924014	15	kup; KUP system potassium uptake protein
K03770	study_day10	-0.347815	0.205782	-1.69022	0.0969737	0.924014	22	ppiD; peptidyl-prolyl cis-trans isomerase D [EC:5.2.1.8]
K03771	study_day10	-0.379779	0.215768	-1.76013	0.0842675	0.924014	14	surA; peptidyl-prolyl cis-trans isomerase SurA [EC:5.2.1.8]
K07263	study_day10	-0.347778	0.248801	-1.39782	0.168103	0.924014	23	pqqL; zinc protease [EC:3.4.24.-]
K07713	study_day10	-0.35273	0.255064	-1.38291	0.172603	0.924014	19	zraR, hydG; two-component system, NtrC family, response regulator HydG
K08961	study_day10	-0.371898	0.633974	-0.586614	0.560001	0.948638	16	K08961; chondroitin-sulfate-ABC endolyase/exolyase [EC:4.2.2.20 4.2.2.21]
K09808	study_day10	-0.341529	0.206648	-1.65271	0.104417	0.924014	25	lolC_E; lipoprotein-releasing system permease protein
K11533	study_day10	0.530587	0.35442	1.49706	0.140424	0.924014	3	fas; fatty acid synthase, bacteria type [EC:2.3.1.-]
K13378	study_day10	-0.345573	0.259186	-1.3333	0.188245	0.924014	24	nuoCD; NADH-quinone oxidoreductase subunit C/D [EC:7.1.1.2]
K15726	study_day10	-0.38294	0.369511	-1.03634	0.304837	0.924014	13	czcA; cobalt-zinc-cadmium resistance protein CzcA
K16363	study_day10	-0.460071	0.261548	-1.75903	0.084456	0.924014	10	lpxC-fabZ; UDP-3-O-[3-hydroxymyristoyl] N-acetylglucosamine deacetylase / 3-hydroxyacyl-[acyl-carrier-protein] dehydratase [EC:3.5.1.108 4.2.1.59]
K21571	study_day10	-0.473523	0.351255	-1.34809	0.183473	0.924014	8	susE_F; starch-binding outer membrane protein SusE/F
K21572	study_day10	-0.439746	0.310719	-1.41525	0.162956	0.924014	11	susD; starch-binding outer membrane protein, SusD/RagB family
K21573	study_day10	-0.496951	0.333152	-1.49166	0.141829	0.924014	6	susC; TonB-dependent starch-binding outer membrane protein SusC
K21574	study_day10	-0.51735	0.305722	-1.69222	0.096588	0.924014	4	susB; glucan 1,4-alpha-glucosidase [EC:3.2.1.3]
K21575	study_day10	-0.500758	0.295044	-1.69723	0.0956318	0.924014	5	susA; neopullulanase [EC:3.2.1.135]

## Sheet: S2_BB12_top_25_gene_LM_day10
geneID	term	Estimate	Std.Error	t.value	p.value	fdr	estimate_rank	Definition
K08961	study_day10	0.275656	0.903011	0.305264	0.761605	0.999633	7	K08961; chondroitin-sulfate-ABC endolyase/exolyase [EC:4.2.2.20 4.2.2.21]
K07862	study_day10	0.243488	0.178045	1.36756	0.178394	0.999633	10	sstT; serine/threonine transporter
K11085	study_day10	0.205302	0.165243	1.24243	0.220661	0.999633	17	msbA; ATP-binding cassette, subfamily B, bacterial MsbA [EC:3.6.3.-]
K02406	study_day10	0.201277	0.224923	0.89487	0.375726	0.999633	21	fliC; flagellin
K09704	study_day10	-0.182909	0.176808	-1.03451	0.306551	0.999633	25	K09704; uncharacterized protein
K00111	study_day10	-0.191108	0.097371	-1.96268	0.0560259	0.999633	24	glpA, glpD; glycerol-3-phosphate dehydrogenase [EC:1.1.5.3]
K08218	study_day10	-0.196753	0.283311	-0.694477	0.491034	0.999633	23	ampG; MFS transporter, PAT family, beta-lactamase induction signal transducer AmpG
K07793	study_day10	-0.197085	0.188306	-1.04662	0.300991	0.999633	22	tctA; putative tricarboxylic transport membrane protein
K00335	study_day10	-0.202154	0.187668	-1.07719	0.287266	0.999633	20	nuoF; NADH-quinone oxidoreductase subunit F [EC:7.1.1.2]
K00986	study_day10	-0.203735	0.271407	-0.750663	0.456851	0.999633	19	ltrA; RNA-directed DNA polymerase [EC:2.7.7.49]
K18138	study_day10	-0.205088	0.218948	-0.936699	0.354026	0.999633	18	acrB, mexB, adeJ, smeE, mtrD, cmeB; multidrug efflux pump
K05878	study_day10	-0.215197	0.182145	-1.18146	0.243768	0.999633	16	dhaK; phosphoenolpyruvate-glycerone phosphotransferase subunit DhaK [EC:2.7.1.121]
K03724	study_day10	-0.220873	0.214634	-1.02907	0.309072	0.999633	15	lhr; ATP-dependent helicase Lhr and Lhr-like helicase [EC:3.6.4.-]
K04084	study_day10	-0.223431	0.294111	-0.759683	0.451495	0.999633	14	dsbD; thiol:disulfide interchange protein DsbD [EC:1.8.1.8]
K07713	study_day10	-0.225869	0.313348	-0.720825	0.47483	0.999633	13	zraR, hydG; two-component system, NtrC family, response regulator HydG
K12340	study_day10	-0.230994	0.332896	-0.693893	0.491397	0.999633	12	tolC; outer membrane protein
K07148	study_day10	-0.232222	0.394966	-0.587955	0.559568	0.999633	11	K07148; uncharacterized protein
K09759	study_day10	-0.256768	0.169403	-1.51572	0.136741	0.999633	9	aspC, aspS; nondiscriminating aspartyl-tRNA synthetase [EC:6.1.1.23]
K03578	study_day10	-0.272394	0.293531	-0.92799	0.358476	0.999633	8	hrpA; ATP-dependent helicase HrpA [EC:3.6.4.13]
K08191	study_day10	-0.282689	0.39867	-0.70908	0.482015	0.999633	6	exuT; MFS transporter, ACS family, hexuronate transporter
K07484	study_day10	-0.291249	0.154827	-1.88112	0.0665831	0.999633	5	K07484; transposase
K21574	study_day10	-0.318999	0.422427	-0.755158	0.454178	0.999633	4	susB; glucan 1,4-alpha-glucosidase [EC:3.2.1.3]
K16053	study_day10	-0.406788	0.408999	-0.994594	0.325372	0.999633	3	ybdG, mscM; miniconductance mechanosensitive channel
K06894	study_day10	-0.445254	0.303336	-1.46786	0.149256	0.999633	2	yfhM; alpha-2-macroglobulin
K09181	study_day10	-0.668533	0.46565	-1.4357	0.158159	0.999633	1	yfiQ; acetyltransferase
